# Supplementary material
Source: PubMed Central journal article supplement (PMC7541647)

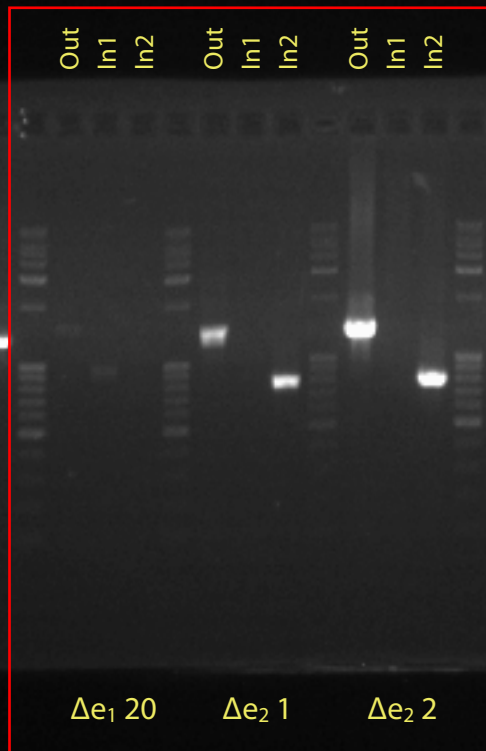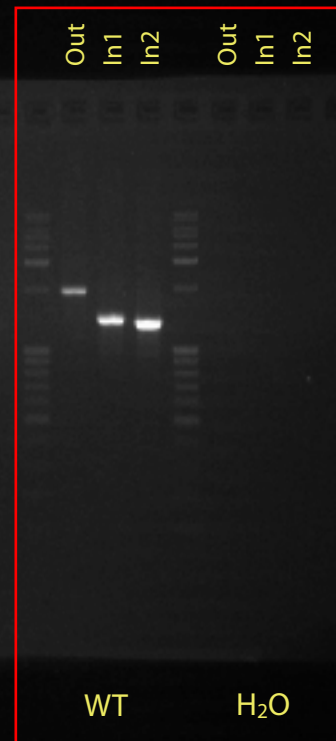

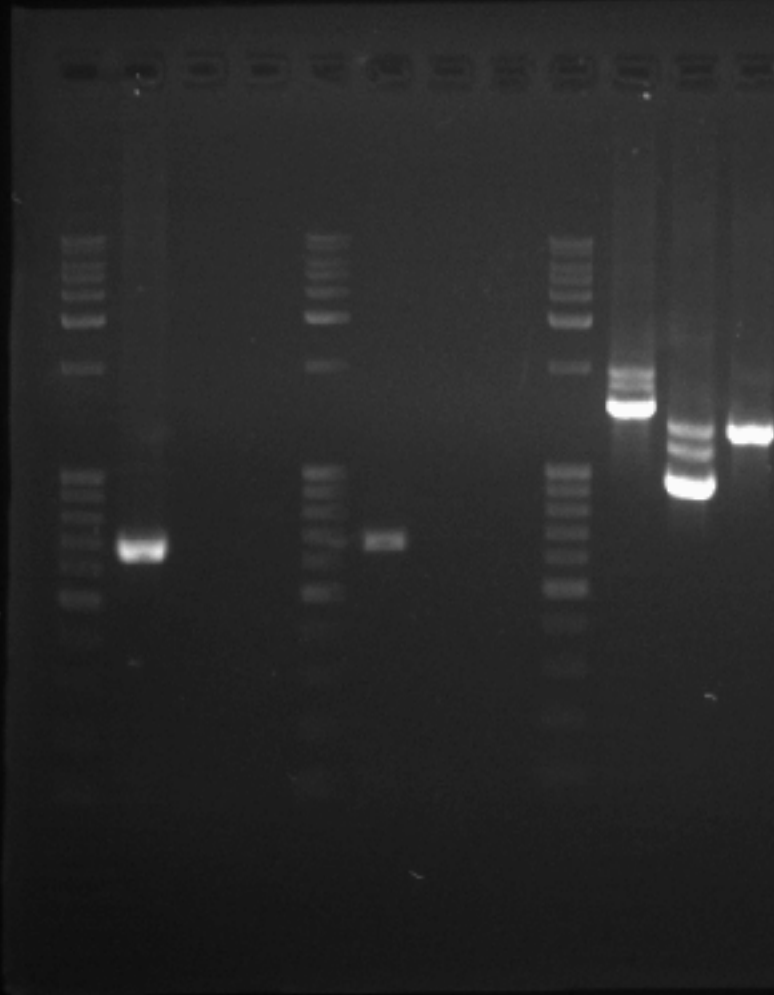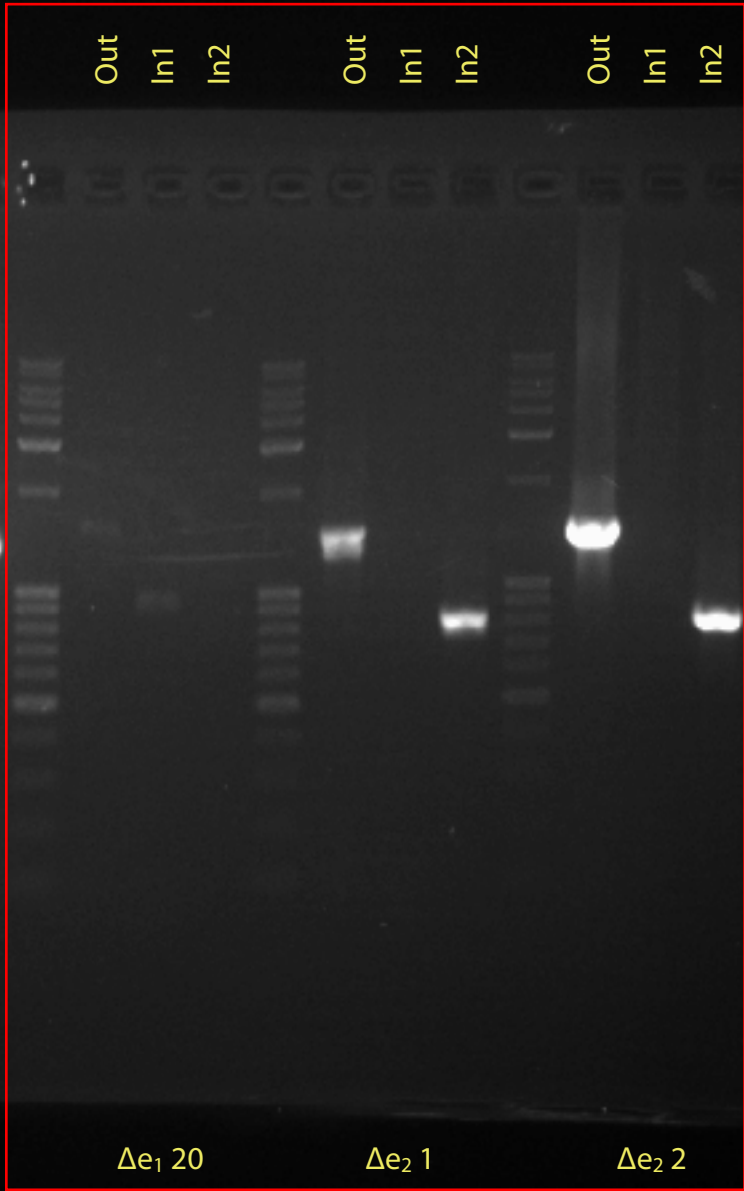

Out  
In1  
In2

$\Delta e_2$

Out  
In1  
In2  
Out  
In1  
In2

WT

H<sub>2</sub>O

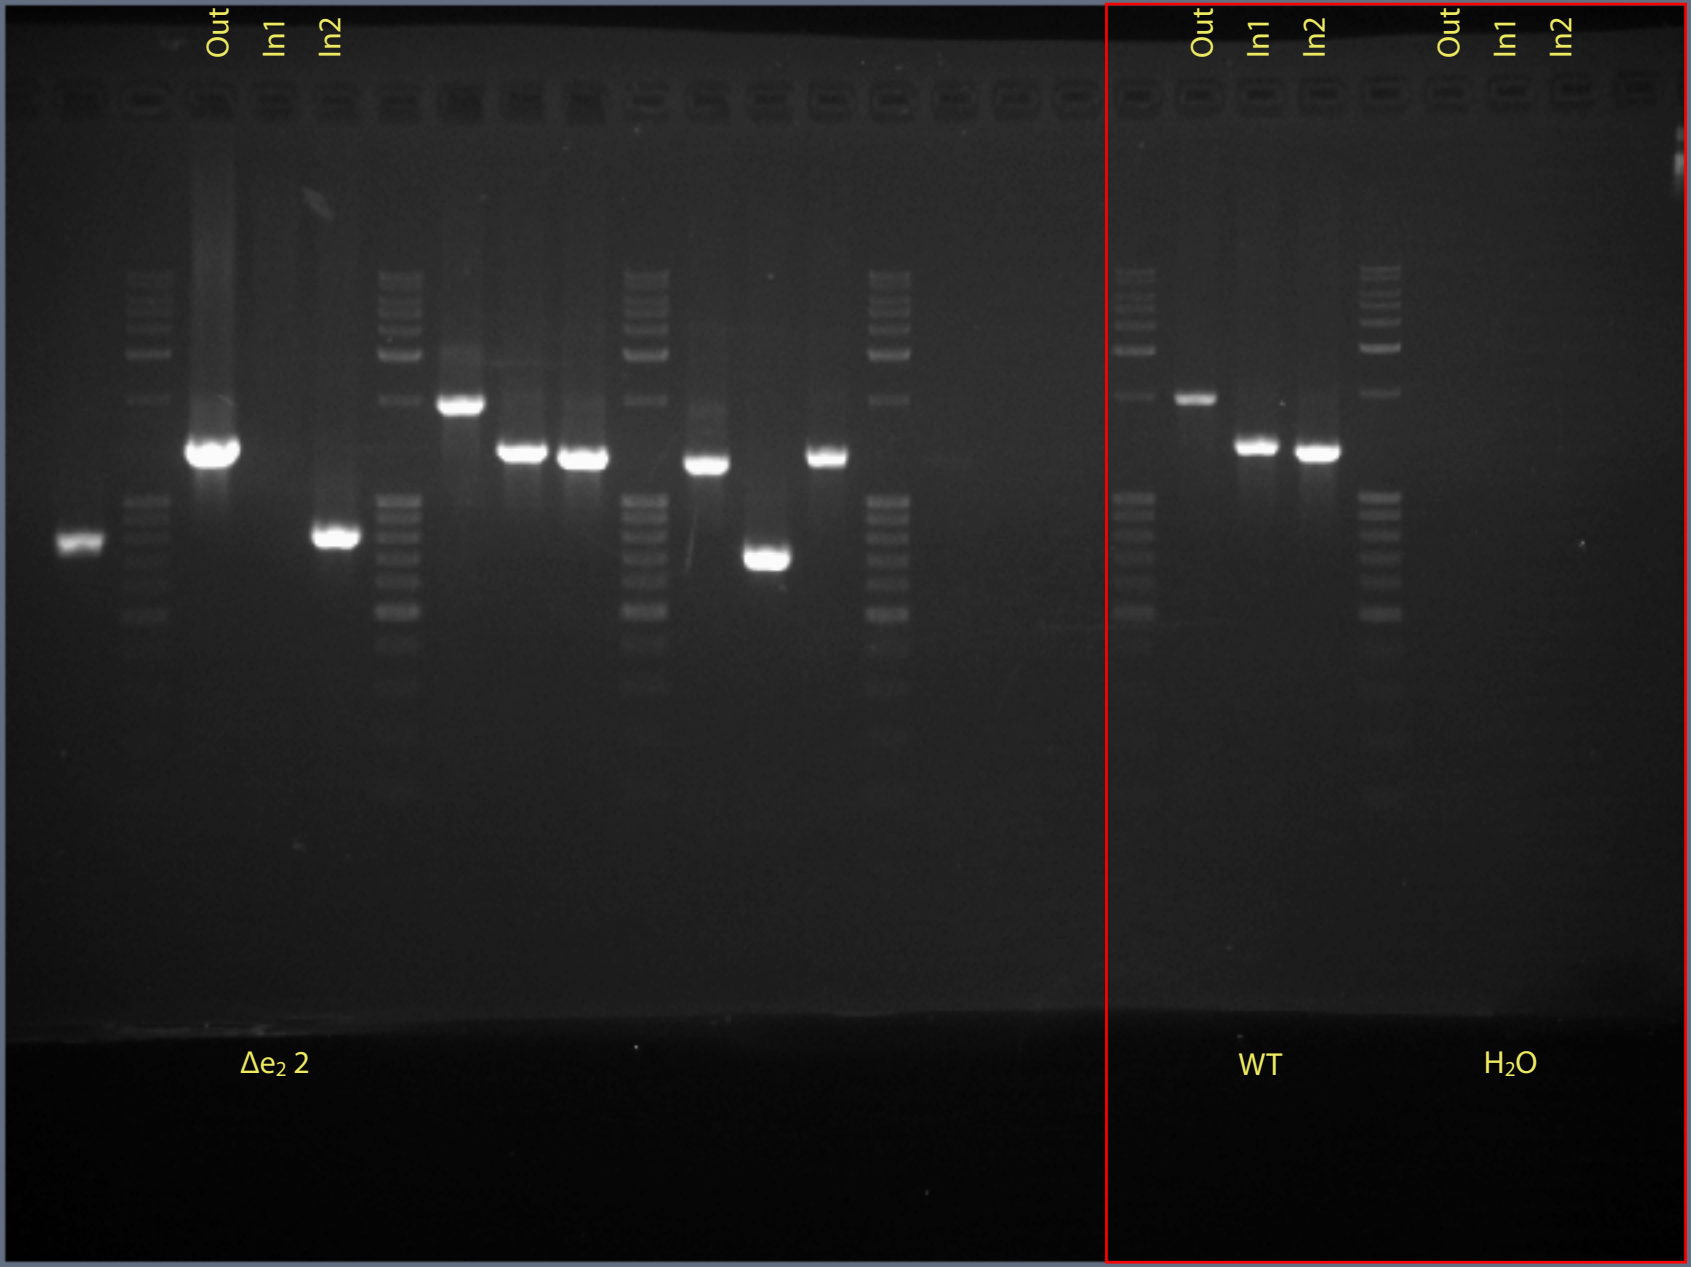

$\Delta C_{34}$

Out  
In1  
In2

$\Delta e_2 15$

$\Delta e_2 18$

Out  
In1  
In2

Out  
In1  
In2

Out  
In1  
In2

$\Delta e_2 20$

$\Delta e_2 21$

Out

In1

In2

$\Delta C 34$

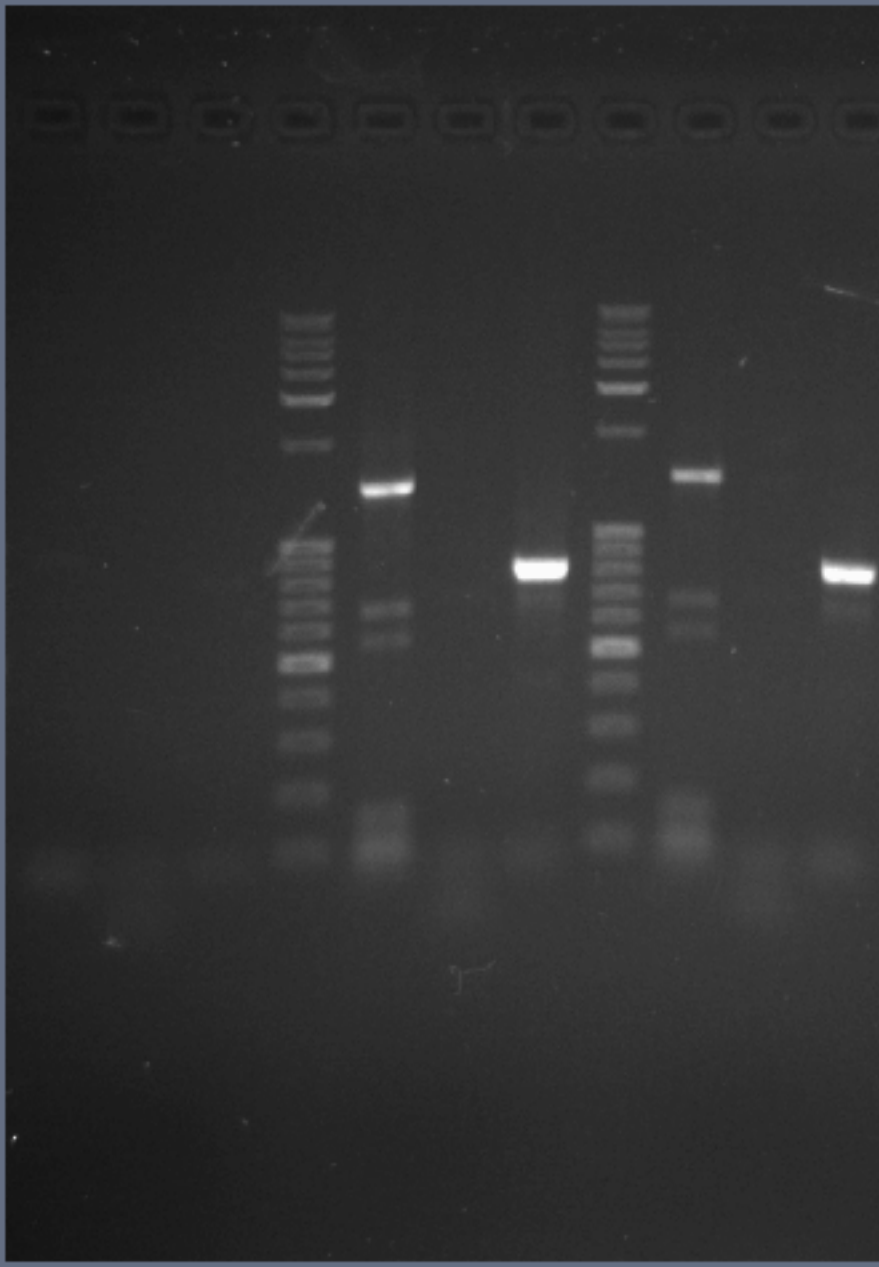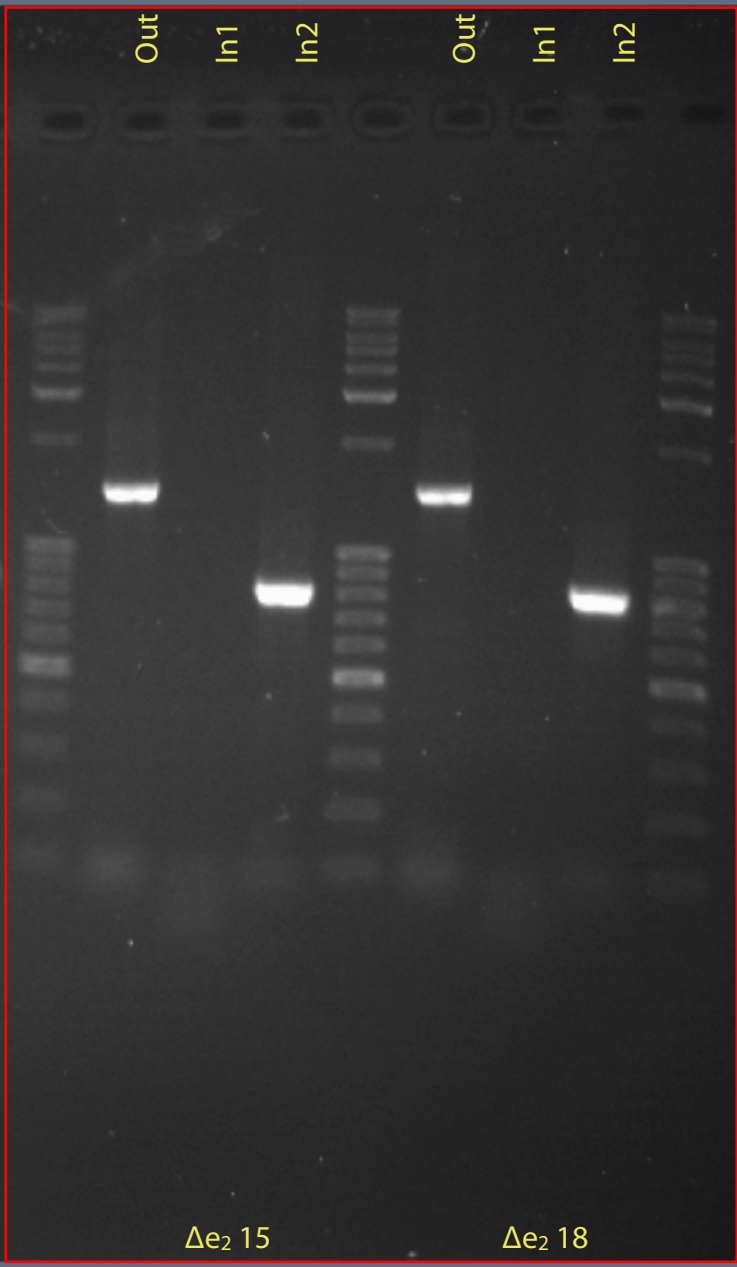



Out

In1

In2

Out

In1

In2

$\Delta e_2 20$

$\Delta e_2 21$

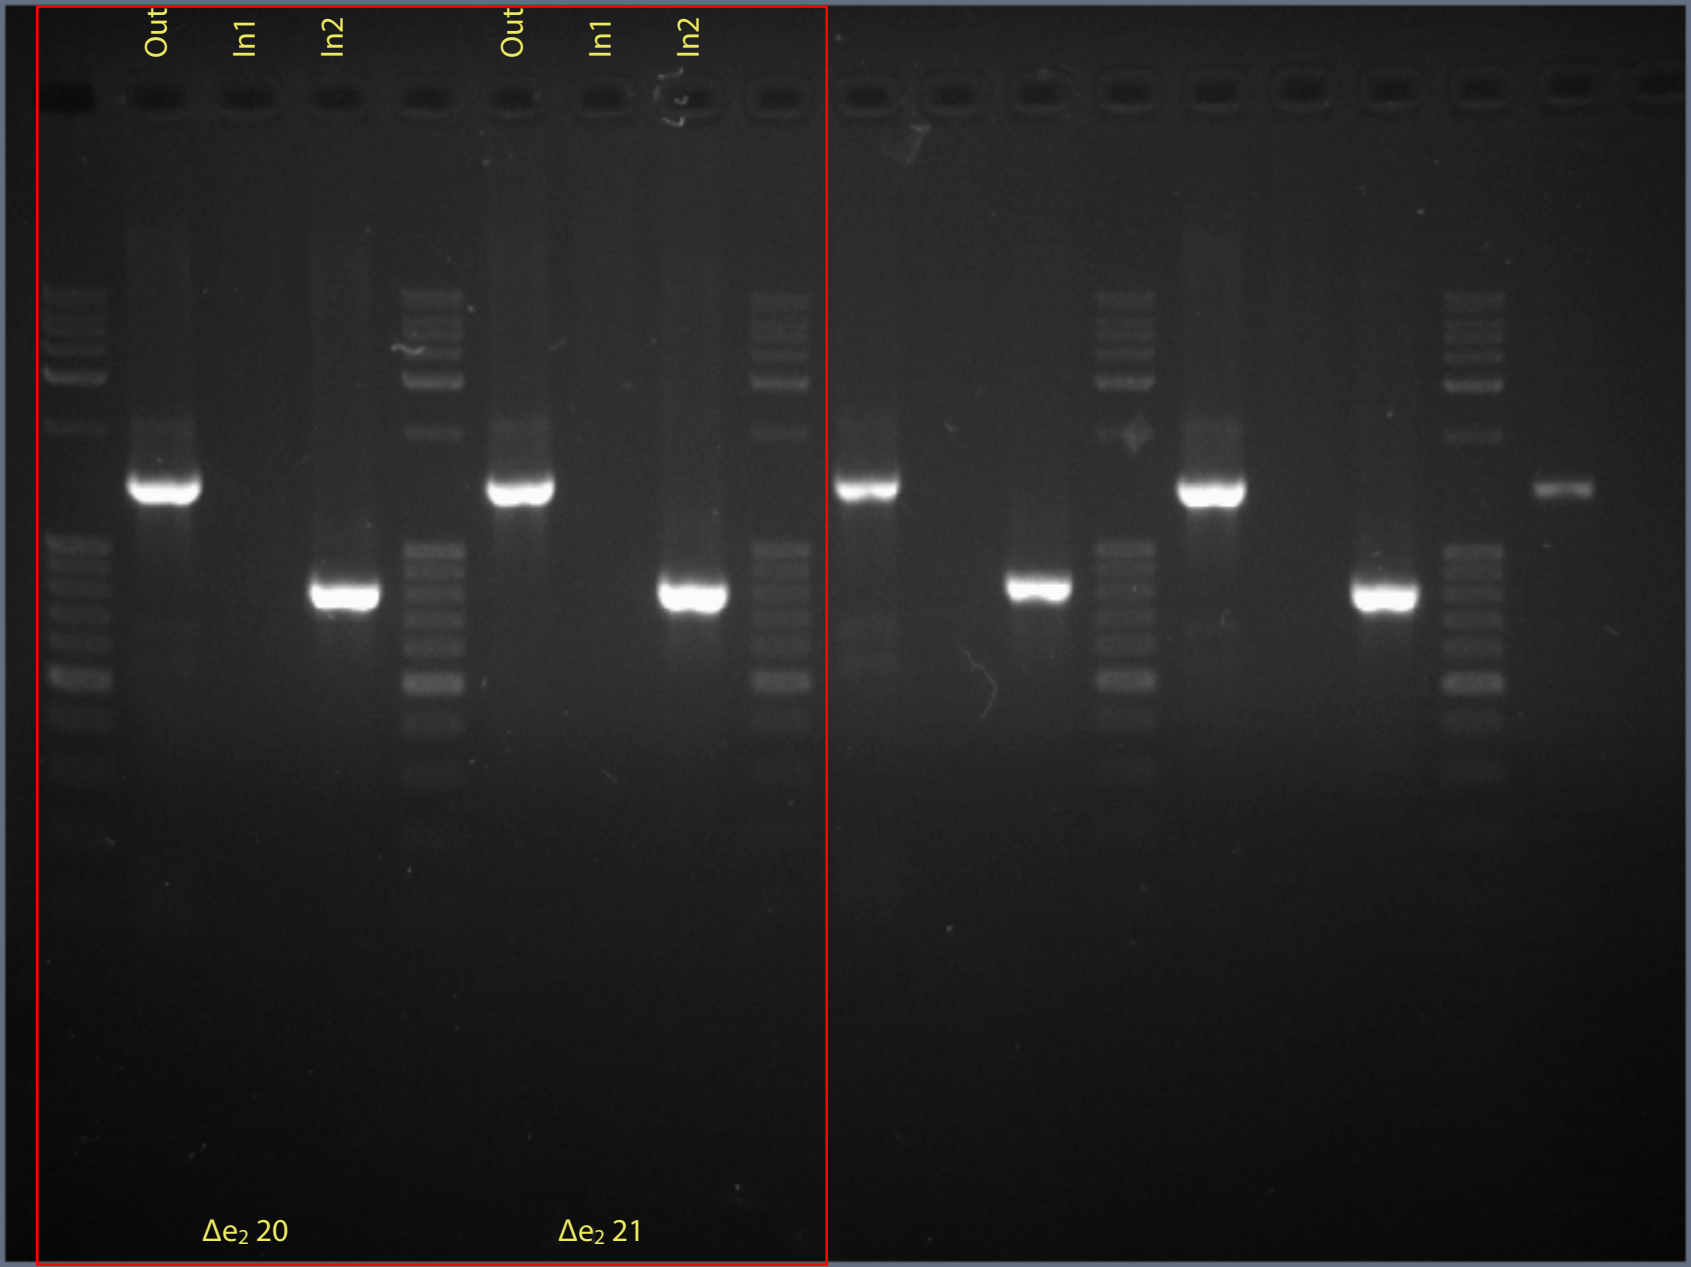

Supplement: NIHMS1616002-supplement-1616002_SourceExtDataFig8.pdf [file NIHMS1616002-supplement-1616002_SourceExtDataFig8.pdf]
